# Supplementary material for: Identification of CDT1 as a prognostic marker in human lung adenocarcinoma using bioinformatics approaches
Source: PeerJ. 2023 Sep 28;11:e16166. doi: 10.7717/peerj.16166 (PMC10542661; doi:10.7717/peerj.16166)
Supplement: Supplemental Information 3 [file peerj-11-16166-s003.xlsx]

## Sheet: Sheet1
gene_symbol
CYP4Z2P
RP11-346M5.1
RP11-184J23.2
RP11-87E22.2
CYP4A11
LINC00940
RP11-95I16.2
GS1-115G20.1
SCGB3A2
RP11-264B14.1
C1QTNF7
RP11-630A13.4
CYP4A22
CYP4Z1
ADH1B
SFTA1P
WDR11-AS1
GRIA1
RP11-1099M24.8
RP11-243M5.4
ADH1A
CAV3
ABCA8
AC005592.3
RP11-479O17.10
AFF3
RP1-186E20.1
RP11-370I10.2
CD300LG
LINC00710
RP11-793H13.3
LDLRAD4-AS1
OTC
INMT
CYP4B1
RP11-164O23.8
LHFPL3-AS1
C1orf132
PGC
AC092667.2
MAMDC2
CFAP221
CTD-2530N21.5
FIGF
ROBO2
SCN7A
MAMDC2-AS1
LOC100421166
ADAMTS9-AS2
RP11-395N21.2
ABCA10
ATP13A4-AS1
LPAL2
RN7SL8P
AC079630.4
LRRK2
RAD17P1
RP11-635O16.2
RP11-80P20.3
TMEM132C
SLC22A3
ERBB4
GKN2
F11
ATP1A2
RP11-641D5.2
PCDH15
CACNA2D2
PEBP4
CADM3-AS1
LHFPL3-AS2
LINC00332
KCNA4
FAM150B
RSPO2
MYOCD
EDN3
MBL1P
LINC00968
WIF1
AC067959.1
RP11-357D18.1
RP11-336K24.5
LSINCT5
FPGT-TNNI3K
CHRDL1
ADRA1A
RPL13AP17
RP11-243M5.3
RIC3
RP11-360A10.1
GFRA1
RP13-514E23.1
RN7SKP51
RP11-408O19.5
RP11-3K16.2
BTNL9
ERVFRD-1
RP11-243M5.5
AC092071.1
RPL26P30
RP11-111E14.1
RP11-243M5.2
C16orf89
LRRN3
RP11-359M6.1
PRG4
C7
PLA2G10
RP3-525N10.2
ZNF385B
CYP2B7P
RP11-2B6.2
ART4
LHFPL3
RP3-331H24.7
RP11-259K15.2
TMEM132D
RP3-331H24.6
MYOC
CLEC4F
SHH
LINC00261
RP11-680C21.1
ZBTB16
HLF
SCTR
C8orf34
RS1
CHIA
CEACAM8
SFTPB
AC005592.1
RP1-163G9.2
MGC27382
RP11-301L8.2
AQP4
C18orf63
RP11-797A18.5
C2orf40
AC013275.2
SOSTDC1
ACADL
LINC00982
RP11-280O1.2
ACOXL
RP1-127H14.3
MUSK
SLC26A9
RP4-568B10.1
PLP1
VIPR1-AS1
B3GALT2
RP11-138A9.1
SLC9C2
SPATA18
ADAMTS8
FCER1A
TRIM71
SFTPD
ADAMTS7P3
RP1-78O14.1
C2orf71
OGN
RP11-44F21.3
PCSK2
FGF10
RP11-238K6.1
MACROD2
PLA2G1B
GDF10
RP11-359M6.2
FENDRR
DUOX1
SUSD2
KIAA0408
HPSE2
RP11-664D7.4
RP11-95I16.6
LUZP2
EDA2R
AC003991.3
SLC5A9
RP11-643A5.3
SCARA5
CTD-2292M14.1
PRMT8
LGI3
AGR3
RNU5B-1
HSD17B6
PLA2G4F
MIR663AHG
CHIAP2
RP11-138A9.2
HOPX
CPB2
AGBL1
DUOXA1
RP11-85G21.3
PTCSC3
LINC01314
RP3-410C9.2
AGTR2
MIR4697HG
TYRP1
SEC14L3
RNU5A-1
OMG
PLCXD3
PTCHD4
SCGB3A1
SPINK5
PRDM16
KIAA2022
AC003090.1
RP11-627G23.1
RNY1
ATP13A4
AC079630.2
LEFTY2
CD1E
OCA2
GGTLC1
FAM216B
FOLR1
SLC46A2
PENK
SFTPC
LINC01105
COL6A6
CD207
PRSS12
RMST
ZDHHC11B
CTD-2196E14.8
CNTN6
C6
PIGR
SFTA3
MEGF11
CLDN18
CDHR3
ANKFN1
ROS1
PTPRT
RP11-356K23.1
CYP2A6
SNTN
SERPIND1
AQP7
NTNG1
RP11-469H8.6
RP11-789C1.1
SFTPA1
RP11-116O18.1
SLPI
SLC6A4
NAPSA
IRX2
CFTR
C4BPA
VSIG2
RP11-66N24.6
ADGB
RP11-320N7.2
SLC14A2
SFTPA2
MSLN
AC008268.1
GGT6
VWA3A
PLA2G12B
CRYM
DNAH9
AQP5
ERN2
AADAC
LRRC31
HHIP
NELL1
SRGAP3-AS2
IRX1
SCGB2A1
CTSE
RNU4-2
HMGCS2
SCGB1A1
GLB1L3
PAX7
