# Supplementary material for: Identification of CDT1 as a prognostic marker in human lung adenocarcinoma using bioinformatics approaches
Source: PeerJ. 2023 Sep 28;11:e16166. doi: 10.7717/peerj.16166 (PMC10542661; doi:10.7717/peerj.16166)
Supplement: Supplemental Information 4 [file peerj-11-16166-s004.xlsx]

## Sheet: Sheet1
gene_symbol
CDT1
PKMYT1
ASF1B
MYBL2
CDCA5
CDC20
KIFC1
TK1
KIF18B
CDC6
KIF4A
TPX2
UHRF1
GTSE1
PLK1
GINS2
BIRC5
KIF2C
CDC45
SPC24
AURKB
CENPA
ZWINT
CDCA8
NCAPH
KIF20A
CENPM
SAPCD2
HJURP
RRM2
TROAP
MELK
UBE2C
CDC25C
RAD54L
SKA1
EXO1
MCM10
DLGAP5
ESPL1
CEP55
CCNB2
RAD51
BUB1B
SHCBP1
FOXM1
TOP2A
SKA3
PRC1
FAM64A
NEK2
CDCA3
FEN1
CDC25A
NUSAP1
NCAPG
PRR11
DEPDC1B
ORC1
MCM4
BUB1
CKAP2L
KIF23
H2AFX
MCM6
ANLN
TACC3
DTL
IQGAP3
POC1A
CCNB1
CDKN3
SPAG5
CDK1
NDC80
MCM2
E2F2
CCNA2
KIF11
KPNA2
TRIP13
C16orf59
AURKA
UBE2S
CHEK1
TTK
TICRR
CHAF1A
E2F1
RECQL4
NUF2
KIF15
CENPN
ORC6
C17orf53
EME1
SGOL1
LMNB1
UBE2T
RNASEH2A
MKI67
KIAA0101
CENPI
DEPDC1
LMNB2
MAD2L1
CDCA2
SPC25
AUNIP
CENPU
FAM72B
MTFR2
GINS3
CENPF
CCNE1
EIF4EBP1
FAM111B
MCM5
CENPW
HMMR
PLK4
TUBG1
GINS1
FANCA
PBK
RP11-424C20.2
NUDT1
CTD-2510F5.4
KIF14
CLSPN
TYMS
RACGAP1
ALYREF
DSCC1
STIL
RP11-303E16.2
BRIP1
TCF19
CCNF
PTTG1
RAD51AP1
INCENP
CDCA4
TRAIP
TUBB
TMEM132A
GINS4
ASPM
TIMELESS
FANCI
FAM83D
CENPE
GAPDH
RDM1
XRCC2
ARHGAP11A
CASC5
FAM72A
DDX39A
CCDC86
BRCA1
CHAF1B
POLA2
TONSL
HMGA1
DRAP1
ESCO2
DIAPH3
TUBA1B
FANCG
MND1
E2F8
RFC2
PFKP
WDR62
SUV39H1
MCM7
PPM1G
TOMM40
RFC4
BOP1
HMGB2
C11orf84
CTSV
RMI2
C19orf48
OIP5
CENPH
BLM
PHF19
WDHD1
H2AFZ
NRM
NCAPG2
COLGALT1
SH3GL1
YKT6
MTHFD2
ZNF367
DHX37
SLC25A39
PSRC1
TUBA1C
NCAPD2
MIS18A
ATAD2
ERCC6L
TBRG4
DTYMK
THOP1
SHMT2
POLQ
SRM
LRRC59
KIAA1524
C14orf80
DDIAS
GSG2
SLC7A5
P3H4
HPRT1
PIF1
TTYH3
EZH2
PSMC4
PLOD3
WDR76
NKIRAS2
NOC4L
POP7
GARS
SLC52A2
CTU2
MRPL12
GPI
CFL1
BCL2L12
PARPBP
KLF16
DBF4
RANGAP1
TCF3
ALG3
ECE2
CDC34
UNG
DKC1
CCT5
PSMC3IP
CARM1
DSN1
KHSRP
ATAD3A
ADRM1
CENPO
CCDC137
CENPK
C19orf40
RANBP1
SGOL2
PGAM5
HELLS
SPHK1
TPI1
RBM42
MZT2A
NACC1
POLD2
TARS
PUS1
FAM207A
SH2B2
PCNA
IRAK1
POLD1
MARS
SLC2A1
SLC38A7
LIG1
SF3A2
SH3BP1
CNP
FAM72D
PAFAH1B3
PAQR4
FAM72C
FBXO5
MARCKSL1
GPR19
CKS2
YDJC
C11orf24
MCM3
SPDL1
CDK2
TMUB1
STMN1
FARSA
ACOT7
GPRIN1
GIT1
NME1
PAICS
UBE2SP1
MAP6D1
CDC7
TMPO-AS1
DDX49
DBF4B
NABP2
LINC00634
RFC5
AIMP2
APEX2
NCLN
SNRPB
RHBDF2
EIF4A3
POLE2
SART1
POP1
RNF126
CHTF18
C1QTNF6
TYMSOS
ALDOA
NEIL3
HN1
RUVBL2
KLC2
CDH24
KIF18A
U2AF2
EIF3B
NAA10
RCE1
PPP1R14B
VRK1
PPIF
SGTA
PRPF19
NSUN5
CHMP1A
PSMB3
CDK16
FANCD2
BRMS1
POLE
LRWD1
HOMER3
C17orf96
C19orf47
GALK1
ZC3H3
ZFPL1
E2F7
MEX3D
CCT6A
RBL1
TRIB3
FAM189B
ISG15
HDGFRP2
ADRBK1
PSMD3
ST14
UBE2M
SLC25A22
WDR18
STIP1
MAP2K2
DUSP14
MASTL
HSF1
FAM171A2
CHEK2
MAD2L2
SAC3D1
NOC2L
PTGES2
ABCD1
MRPL11
SF3B4
GPS1
CDKN2D
LIMK1
RAN
PSMD2
MRGBP
FSCN1
PSME2
PPP4C
YIF1B
ARHGEF39
MFSD12
BRI3BP
PDAP1
CCM2
STRN4
SIRT6
ZNF598
SHKBP1
PYCR1
YIF1A
FADD
SLC3A2
LAGE3
ACD
TUBB3
AP2S1
CD3EAP
KIF22
LRR1
LRFN4
NDUFS6
CCDC124
MTL5
MMP14
PFDN2
TRIM28
RRP1
CKAP2
UBALD2
SLC12A8
CENPL
PPP1R14BP3
ACTN1
SNRPF
SERPINH1
PAK4
HSPD1
PDRG1
RAVER1
DOHH
HPDL
UBL4A
KCTD5
TAF6
SNX8
SCYL1
RPUSD1
RRP9
CSNK1G2
CD276
MZT2B
PLOD1
MRPS12
SLC16A3
MIF
PGP
ECT2
PRMT1
NOP2
PRR19
C11orf98
KIF3C
SSSCA1
NUP210
RTKN
HGS
PCNXL3
PVRL2
BANF1
MYO19
CCDC34
BYSL
CAD
C5orf34
FBL
DBN1
RIPK2
TCOF1
LINC00337
REXO1
TMEM206
CORO1B
PPAN
DDX54
UCK2
FAM50A
DNMT3B
KIF20B
ARHGDIA
KNSTRN
CTHRC1
LOXL2
ATG101
PSMB5
GADD45GIP1
SIPA1
SASS6
ZDHHC12
FANCB
PDF
GMNN
CKS1B
LONP1
ZNF408
PROB1
RNF26
CKAP4
KREMEN2
TBCB
COPE
AP5Z1
TEAD4
MYL6B
EIF5A
PPP1R18
GGH
WDR34
DNMT1
UQCC3
KNTC1
MRPL15
ENO1
EXOSC4
EMC9
GNB1L
NCAPD3
MRPS24
MFI2
AGMAT
MAP3K10
POLR2J
PFKFB4
ERO1L
SNRPC
PPAT
FKBP10
FBXL19
COMTD1
PNP
PRKCSH
AURKAIP1
TRMT61A
SLC10A3
TFPT
PLIN3
INTS1
CLPP
CCT3
REEP4
C9orf40
PRICKLE3
MAZ
PUF60
CCDC167
PKN1
DUS1L
MYLK2
CCDC85B
PKP3
PYCRL
POLRMT
H1FX
HSPBP1
CEP131
SLC27A4
GNB2
CHPF
CDK4
DPP3
MRPL4
TUBB4B
TIGD5
RUSC1
PRIM1
MMD
SMOX
RCC1
ALDH1B1
C17orf70
KCTD17
TAP1
ADA
LDHA
FIGNL1
BRAT1
MB21D1
ASNS
B3GAT3
RPS6KA4
IER5L
C20orf27
ATF5
MTBP
CERCAM
ANAPC11
RELB
FAM127B
MRPL36
TWF2
RHEBL1
MBD3
B4GALT2
VARS
ZNF787
RP11-126K1.2
NFKBIB
DDX11
HSD17B10
SCAF1
SBNO2
PPARD
RP11-289I10.2
TIMM10
GNPNAT1
PKM
TBC1D31
EFHD2
EIF6
NDUFS8
MTFP1
HAPLN3
IL4I1
CLCN2
MEST
MMP9
NR2F6
ARF5
STC2
ABHD8
SCRIB
SPAG4
METTL1
MAP1S
RFNG
RAD54B
CCNE2
CHCHD2
FKBP4
ZNF768
TIMM17B
DBNDD1
P2RY6
HGH1
MTX1P1
CHAC1
GUCA1A
ATP6V1F
PPP1R35
TPI1P2
RP11-443B20.1
MYO7A
C20orf24
CAMK2N2
FAM89B
EBP
HES4
CDK5R1
PSME2P2
LRRC61
MRPL28
F12
TDP1
NPM3
MAFG-AS1
DAPK3
DDN
SCAND1
C4orf48
KRT8
COL11A1
ACRV1
POLR2I
CD7
RP11-244M2.1
APOBEC3B
PDLIM7
APRT
IFI35
RP11-863P13.3
PDIA4
COL1A1
DHCR7
RPLP0P2
ZMIZ2
FBXO43
DUS3L
RRS1
AC005077.14
ATP5D
RELT
TIMM13
ARL2
TMEM161A
RPL39L
C9orf16
IDH2
TSSC4
CPTP
MGAT2
C19orf24
LRRC45
BCAR1
RCOR2
GAS2L3
REEP2
CTB-58E17.5
SH2D2A
OAS3
BSG
TICAM1
SYNGR4
SPATA2L
FSD1
TMSB10
ZNHIT2
GAS2L1
CDKN2C
RHPN2
GAL
CIB2
MCM8
TMEM106C
RHOF
ZNF296
SKP2
CCDC150
SHOX2
AK4P1
USP18
TPBGL
PSPH
SNAI1
KRT80
KRT18
RPP25
DDX11-AS1
SSNA1
PLOD2
GMPSP1
ADAM12
AC005624.2
MXD3
PUSL1
DDAH2
PDXP
MDFI
C7orf50
GAREML
RP11-564D11.3
ADAMTS4
PPT2
RP11-649A18.12
IRF7
ARHGAP11B
HSD3B7
GAPDHP63
RP11-312J18.5
TSKU
ZP3
TNFRSF4
EMC6
FOXD2-AS1
TIMP1
NKAIN1
PMAIP1
PSMG3
IGF2BP3
PLEK2
RP11-298C3.2
ZNF628
ISOC2
PRR7
BOLA2B
CYC1
RELL2
DDX12P
ZNF358
TUBA4A
BCL3
CDC42EP2
SLC6A8
SLC2A6
TTLL12
PLXNA1
ATP6V0C
TRPM2
BDKRB1
KIF24
SLC2A5
RBM38
SDSL
NXPH4
PSAT1
MAST1
ERICD
MVD
CDCA7
TFR2
C19orf26
RP5-1120P11.1
SP6
OAS1
ZNF385A
ROMO1
TELO2
PPAPDC1A
CMTM3
ADM
RAC3
LSR
TNFRSF18
RNF144A-AS1
PSMB9
JOSD2
H2AFJ
PTPRN
FRMD5
LIMD2
DRP2
C9orf142
EVA1B
SH3PXD2B
TYMP
ATP2A1-AS1
DNTTIP1
A4GALT
RP11-108L7.15
C2orf48
FADS2
ST3GAL4
HILPDA
DDIT3
RP11-160O5.1
CSNK2B-LY6G5B-562
MFSD2B
NDUFB7
AC015849.16
TSPAN33
SEMA4B
STX1A
GAPDHP65
FAM222A
SNRPGP2
IMPDH1
CHCHD2P9
FAM195B
RHOV
EXOSC5
TMEM158
CDR2L
RNFT2
OR51E1
SLC2A4RG
LINC00511
SEMA6B
PSMB8
IGSF9
TUBBP1
GAA
LBX2-AS1
MRPL41
JUP
PLAU
GPAA1
HSPB1
KLHDC7B
NCS1
GJB2
PHLDA2
AP000695.6
SECTM1
SPRED3
RAB3IL1
ELFN1
PSMB10
RP11-22N19.2
WARS
ZNF695
C1QL1
FJX1
ITGA5
GZMB
RP11-465L10.10
BATF2
CBX2
PLEKHG6
LHX2
STRA13
AC016700.5
HMGA1P3
KB-1732A1.1
C2orf82
TRIM47
FBXL6
APCDD1L
RAB3B
CPLX1
DLGAP3
SEMA7A
PLXNA3
CPD
TPRN
GREM1
GEMIN8P4
CCL26
BATF
PRTFDC1
DBF4P1
UBE2SP2
THY1
ARNTL2
CNIH2
KB-1460A1.1
FADS1
HELZ2
OLFML2B
ELOVL6
DHFRP1
NETO2
HCN2
EMILIN1
FAM101A
C19orf57
RP11-259N19.1
PTMS
LGALS1
RPS2P32
SLC9A3R1
GPX8
MIR4653
FBLN7
PLIN2
EPHB2
PLVAP
VGF
MMP11
GALNT6
LAG3
CD248
RP11-295K3.1
ZNF93
MFI2-AS1
ADAT3
STRA6
HTRA3
CTXN1
SPOCD1
TUBB2A
AP000695.4
C15orf48
MMP12
MSC
RP11-806H10.4
NME2
CPXM1
PGF
NUDT8
MCHR1
COL6A2
AC144652.1
CTD-2006C1.6
AP003068.9
FOSL1
HTR1D
RP11-98D18.3
ARTN
TERT
MDK
ATP5G1P4
XIRP1
GPR115
WASF1
ADM2
CLEC11A
SULF1
CTD-3065J16.6
AK4
TOB2P1
APOE
RP11-381E24.1
SV2A
CD320
LINC00346
DAGLA
PHGDH
ANKRD13B
MICB
TIGD3
KLC3
RIBC2
RHBG
SEMA5B
MT1H
ZYG11A
TUBAP2
AP001505.10
SIX5
AC133785.1
PDCD1
IRS1
VPS9D1-AS1
MFSD3
ZBTB12
NDRG1
CILP2
RP11-417E7.1
MT2A
PRDM12
PCAT6
CHST1
GPC2
DMC1
RCN3
COL5A2
FAM57B
TMEM184A
BAI2
NRARP
ADAMTS7
RP11-417L19.4
PFN2
MOCOS
RHPN1-AS1
CCL7
PXDN
RP11-632L2.2
SYCE1L
HMGA1P1
TMEM145
ANGPTL4
F8A1
OTX1
COL6A1
RP11-157F20.3
EGLN3
SPON2
FAM83A
PITX1
CTD-3035D6.2
MPP2
CLDN14
PACSIN1
IL1R2
PLEC
GPR97
TPI1P1
GPR84
HSPA6
CTB-63M22.1
RP11-452I5.2
GRIN2D
SULT2B1
SPTBN2
SNTA1
RP11-44N12.5
RP11-573D15.1
WT1
TNNT1
RP11-118K6.3
EPN3
RP6-65G23.3
STC1
FBXO41
LHFPL5
STRIP2
KIF7
FCHO1
THBS2
DMBX1
RP5-1059L7.1
RP13-463N16.6
TNFAIP6
SLC16A1
PLAUR
RNF103-CHMP3
BRSK1
RP11-634H22.1
RP3-512B11.3
MAMSTR
AL589743.1
MEX3A
RP11-539E17.5
COL5A1
SH2D5
RP11-791G15.2
2022-09-03
B3GNT4
PPP1R3G
GPR37L1
RP5-907D15.4
RP11-309L24.4
PYGL
MFAP2
CATSPER1
SLC45A1
RP3-395M20.12
QPCT
SOWAHD
FATE1
IGFBP3
FAM225A
CLDN3
STYK1
CD14
OASL
SBSN
IL32
NGEF
CTA-384D8.31
IGF2BP2
RASD2
RP11-14N7.2
DNM1
COL1A2
G6PD
SFN
ANKLE1
COL18A1
SLC39A4
AGRN
PTPRH
IL27
ELFN1-AS1
PRRX2
ADAMTS2
CTB-52I2.4
TWIST1
HES6
STEAP1
PNCK
SLC29A4
APOL1
IL36RN
TM6SF2
IL23A
SMO
DRAXIN
KRT18P10
TFAP2A
CPT1C
WBSCR28
STEAP1B
LINC01063
SSTR2
KISS1R
EFNA3
RUNDC3A
RP4-694A7.2
MTMR11
PLAC1
COL5A3
COL3A1
KCP
HK2
MXRA5
KRT19
NAMPT
RP11-84A19.3
KIR2DL4
MB
RP11-295G20.2
ADAMTS12
SMCO2
KLHL2P1
TMEM121
B3GNT3
ANKRD18B
FAM132A
CTD-2318O12.1
C1orf61
AC015849.15
PCOLCE
GAL3ST2
KIFC2
HOXA1
HHIPL1
JAG2
RP11-22B23.1
RAB15
XXbac-BPG248L24.12
TNFRSF9
RP11-1246C19.1
C1QL4
ADAMTS14
RLTPR
SEMA3A
ENPP1
SLAMF9
CHCHD2P2
LINC01224
CTD-2589H19.6
SPP1
RP3-325F22.5
KCND2
PLEKHN1
HOXB7
RIN1
BEND6
GBP1
RP11-670E13.6
WISP1
CNTD2
SLC6A17
LYPD3
SMKR1
CTD-2162K18.4
CELSR3
HSPB1P1
AC006538.1
DNAJC22
AC093850.2
CCL3
LINC01116
RP11-505K9.1
OSR2
DUSP5P1
IGLON5
MT1X
RP11-336A10.5
ISLR
FNDC4
HIST1H3H
GREB1L
ALDH3B2
ARL9
ADAP1
AC114730.3
GBX2
RP11-54O7.18
GPT2
ITPKA
CTD-2357A8.3
RP11-21L23.2
PERM1
AC010980.2
HSD17B14
FHL2
ESM1
GPC6
PLCD3
RP11-357H14.17
ELOVL7
NT5DC4
C1QC
HOXB9
TRIM15
SP8
G0S2
FZD2
GNG4
ITGA11
ATP8B3
COCH
DPF1
OR2I1P
RASL10B
LINC00887
RP11-650L12.2
OR2B6
AP000251.3
CHRNA5
BCL2L10
CREG2
NID2
NKG7
RP11-462L8.1
MT2P1
GPC1
GPR35
EFNA2
HOXB6
OPLAH
HAMP
B4GALNT1
HOXA11-AS
BIK
SRXN1
B4GALNT4
SIGLEC10
CTD-2532K18.2
ISL2
SLCO4A1
STMN3
SCT
POSTN
IGF2BP1
RP1-34B20.4
AGAP2-AS1
DUXAP10
SCG5
TMEFF1
PAX9
MT1G
FAM172BP
SDS
RP11-57A19.2
CXCL10
NRTN
COL22A1
CHRM4
RP11-783K16.5
NEU4
SNCG
SPOCK1
OTOF
NDUFA4L2
UCN2
GALNT14
TMPRSS11E
GFAP
PDZD7
IL22RA1
SFRP2
CXCR3
CDH3
RP5-884M6.1
TMEM171
KRT8P45
LILRB4
BMP8A
RP11-21L23.3
NAPRT
RP11-561N12.5
KCNF1
ULBP2
MGAT5B
HOXC6
SERPINE2
VPS37D
SRRM3
ZNF703
HIST1H2BJ
DUSP13
MCIDAS
FAM83A-AS1
ACAN
KCNMB4
SPATC1L
VCAN
CTD-2008P7.8
IL17C
POTEF
LA16c-60H5.7
COL7A1
IL11
CXCL8
GAP43
C1QA
C2CD4A
FAM195CP
RPL18AP3
SRMS
RNF157
CBS
TGFBI
TEX11
RP11-626G11.4
LYPD5
KCNK12
SCML2
CBLC
MYH6
FLNC
RP1-86C11.7
TUBB2B
THEGL
PCDHGA1
HIST1H2AG
RAMP1
LUCAT1
PTHLH
RNA5SP18
RP11-559N14.5
MAPK8IP2
CTD-2555C10.3
CMB9-22P13.1
NETO1
LAMB3
RP11-10A14.4
C10orf55
VAX2
COL12A1
GALR2
RP11-1069G10.2
SBK3
EPYC
GLDC
IL1RAPL2
TMEM61
NPTX2
JSRP1
DSP
RP11-102K13.5
CDC20P1
GABRD
SRPX2
ALPK2
PSMD10P2
GFY
RP11-98G7.1
HOXA10
CTC-548K16.1
LAMC2
LINC01561
LRRC15
FOXO6
IDO1
CCL8
PCDHB8
RIPPLY3
AIM1L
TFAP2A-AS1
CTD-3010D24.3
CLGN
CTC-260E6.4
CRABP1
RP11-395N3.2
SERPINE1
GPR37
IBSP
GZMM
TAS1R3
C6orf223
OVOL1
SYT5
SLC25A21
FAM26F
RETNLB
INHBE
MYH16
RP11-402G3.3
CD109
HIST1H2BO
ISM2
MNX1-AS1
UPK2
HOXC-AS2
PTGES
MYEOV
LINC00665
ZNF488
CNFN
CDK5R2
AHRR
RP11-549B18.1
CD70
PDLIM4
TREML3P
NTNG2
ECEL1
C2CD4C
KRT16
RP11-145A3.1
LINC00525
LINC00629
NKX3-2
CTD-2377D24.6
FOXD3
LHX5
ITGA2B
PRAME
KLK2
FGF11
RP11-10A14.5
KCNK9
WT1-AS
RP11-1C8.7
LINC01234
VSTM5
ADAMDEC1
DUSP9
FOXD3-AS1
NKX1-2
FER1L4
HOXC9
FOXB1
CHRNA9
FLJ42969
MMP17
BAIAP2L2
CARD14
HOXA11
NMU
MTCL1
FA2H
CTD-2171N6.1
IFI27
TUBB4A
CCL4L1
C12orf56
RP11-1C8.4
SAA1
CYCSP6
LILRP2
BHLHA15
RP11-95M15.1
QPRT
HOXC4
CGREF1
IGHG1
DLX5
POMC
LINC01117
AC002331.1
CILP
HIST1H2AM
CCL11
HIST1H2AI
CALML3-AS1
FAM131C
NAT8L
AC011298.2
RP11-132A1.4
RP11-480I12.5
RP11-150O12.1
SYT12
PRSS3
HCG4P5
LINGO1
AC005077.12
TPSP2
TENM3
CDC42EP5
PKIB
YBX2
FOXD1
CERS1
LINC00704
ACY3
LINC00941
NR5A1
APLP1
HOXB8
ASPHD1
ATP1A3
MAGEA3
LINC00880
KCNG1
GJB3
HOXC8
PPY2
CXCL11
ARHGEF4
MMP1
CYP4F23P
KLK1
PADI1
RP11-34P13.15
RP11-713M15.2
CTC-480C2.1
VSTM2L
GPR1
JPH3
H19
FAM132B
RP11-384O8.1
UBD
LINC00567
APBA2
FHOD3
TRIM10
RP11-680F8.1
ASCL2
CST6
KRT81
SOHLH1
HMGA2
LYPD6
PRR36
ERVMER34-1
RP11-616M22.7
TCAM1P
PKP2
GAD1
CDIPT-AS1
CXCL9
CYP4F26P
ENTPD2
ESPN
SIGLEC12
RP1-90L14.1
ELOVL4
PPP1R14D
LINC01296
CCNO
L1CAM
AVPR1A
RP11-964E11.2
CDA
FAM83F
LHX1
EGR4
KRTAP3-1
IGHGP
RP11-221N13.3
DIO2
FTCD
HIST1H1PS1
GRIK5
LGALS17A
RGS20
RIMS2
VIL1
GAPDHP1
RP11-817J15.2
PPFIA4
RP11-469A15.2
APOBEC1
ADORA1
RP11-551L14.1
GRM4
CKM
KRT83
NECAB2
CEMIP
UPK1A
FGF5
OSGIN1
NAMPTP1
FFAR2
POPDC3
C19orf45
RP11-161I6.2
MFAP5
MUC16
USH1G
LINC01214
INA
DLL3
EVX1
HGFAC
TEX19
RP11-190J1.3
TMEM74
ZIC2
CRYBA2
MAGEA6
SLC4A11
SP3P
NR2E1
SYT1
CSAG1
VWDE
CASKIN1
RASGEF1C
HOXD13
IGHG2
LINC00973
LINC00942
NPSR1
ALG1L5P
SLC5A5
IGHG3
ZNF280A
RP11-219G17.4
NTSR1
UCHL1
CST4
KIF1A
FAM133A
LYPD1
KLK4
GRIN1
NKAIN4
F5
CLPSL2
KRT78
S100A8
LY6K
PCDH7
HIST1H3B
KRT8P11
GPAT2
CRABP2
TNFSF11
RP11-713C5.1
PCDHA1
TNS4
RP11-138J23.1
MAGEC1
TGM5
CPA4
RP11-89K21.1
KLK6
FGB
HOXD11
RTBDN
GPR87
LINC01235
RP11-167H9.4
CDH2
AC011294.3
APCDD1L-AS1
CDH18
HOXB-AS4
CCL20
ERVV-2
CA9
TH
KCNN4
SUN3
MAGEC2
RPSAP52
HIST1H2AD
PLXNB3
SIM1
NEURL1
CST1
CSAG2
TMEM40
SIX3
DNAJC12
AL109763.2
CSAG3
LINC00355
RP11-103J17.2
SAA2-SAA4
AMH
TNC
TDRD12
PAPL
RP11-191L9.4
ACTL8
AIM2
IGHM
GSDMC
SAA2
WFDC3
S100A9
ANXA13
RP11-159J3.1
CTD-2291D10.4
SPTB
C2orf72
LINC00664
KHDC1L
RP3-323A16.1
AGT
CALB2
PNPLA5
S100A2
RNF186
HIST1H2AE
SLC39A5
PRAC2
HIST1H2BH
HTR3A
RP11-476K15.1
TRPM2-AS
RP11-308B16.2
NEFH
CDKN2A
RP11-169F17.1
ABCA12
PRR15
MSI1
DLX6
HOXA13
CASC9
SERPINB5
IFNWP19
ADAMTS20
LIPK
IGFL2
SLCO4A1-AS1
RP11-408B11.2
MYCN
KLF2P1
MAGEA12
CLPSL1
COMP
F7
PRAP1
ZIC5
CHGB
MAGEA1
LYPD8
RP11-575F12.3
FIBCD1
UGT8
OGDHL
CTD-2591A6.2
TRPM8
CABYR
LINC01446
KIRREL2
MIR31HG
SYT13
RP11-211G23.2
COX7B2
HOXB13
GPR158
HHIPL2
GABRA3
SMIM24
MIOX
UPK3A
OBP2A
IL20RB
RP11-785D18.3
HOXD10
EDN2
EREG
HIST1H2BG
PAEP
TNNC2
GJB6
CALY
IGHV4-39
TNNI3
CAMK2B
MAGEA10
DEFB1
SMC1B
CTD-2147F2.1
PI3
MUC13
TRIM72
NPC1L1
PCSK1
MAGEB2
LINC01194
DKK1
ZFP57
MMP10
FAR2P1
TINAG
S100A7
PEG10
SLC5A12
MKRN3
TFPI2
PADI3
FUT6
FGFBP1
LIN28B
AC098973.2
SERPINA5
PCP4
SOX2
TEX15
ABCC2
PITX2
C11orf86
PPP2R2C
NFE4
KRT6A
POU4F1
IGFBP1
IGLV9-49
SIX2
SERPINB4
ST8SIA6-AS1
F2
NPW
AC010091.1
LINC01419
MAGEA4
PAGE2
KRT17
LY6D
CTAG2
KCNMB2-AS1
LDHC
ARL14
LINC01291
SOX21
EEF1A2
CALML3
TF
PSCA
GJB5
PDX1
SLC15A1
KRT6B
HNF1A
HOXC12
REG4
CNTNAP2
USH1C
AKR1B15
CT83
ANKRD34B
FOXI3
KLK8
CLDN6
AKR1B10
TCN1
BPIFA1
EPS8L3
CPS1
FGA
TFF1
PSPHP1
