# Supplementary material for: Identification of CDT1 as a prognostic marker in human lung adenocarcinoma using bioinformatics approaches
Source: PeerJ. 2023 Sep 28;11:e16166. doi: 10.7717/peerj.16166 (PMC10542661; doi:10.7717/peerj.16166)
Supplement: Supplemental Information 5 [file peerj-11-16166-s005.xlsx]

## Sheet: CDT1
Normal		Ct Mean	ACT	△CT	△△CT
A2	CDT1	29.622	17.1035	12.5185	0.294154	0.81555
B2	CDT1	29.8611	17.3394	12.5217	0.297326	0.813759
C2	CDT1	33.8646	22.1305	11.7341	-0.490241	1.40468
D2	CDT1	31.829	19.2378	12.5913	0.366921	0.775436
E2	CDT1	32.4001	19.9355	12.4646	0.240256	0.846595
F2	CDT1	31.9359	20.8691	11.0668	-1.15757	2.23081
G2	CDT1	30.871	17.9901	12.8809	0.656552	0.634393
H2	CDT1	29.712	17.4884	12.2236	-0.000748873	1.00052
J2	CDT1	30.3297	17.9267	12.403	0.178694	0.883502
K2	CDT1	31.0252	17.8355	13.1896	0.965312	0.512168
L2	CT1	28.5425	17.3685	11.174	-1.05039	2.07108
M2	CT1	29.1748	17.8272	11.3477	-0.876662	1.83612
P2	CT1	30.8433	18.2972	12.5461	0.321755	0.800096
Q2	CT1	30.3452	17.4797	12.8655	0.641207	0.641176
R2	CT1	30.666	18.2617	12.4044	0.180018	0.882692
S2	CT1	29.5	17.8423	11.6577	-0.566592	1.48102
				12.2243	0	1
Tumor		Ct Mean	ACT	△CT	△△CT
A1	CDT1	30.3446	18.1715	12.1731	-0.0512726	1.03618
B1	CDT1	29.763	17.211	12.552	0.327691	0.796811
C1	CDT1	27.2638	18.4073	8.85653	-3.3678	10.3231
D1	CDT1	34.0068	21.6815	12.3253	0.100976	0.932402
E1	CDT1	30.2262	20.001	10.2252	-1.99918	3.99772
F1	CDT1	29.3466	17.6361	11.7105	-0.513858	1.42786
G1	CDT1	27.9374	17.1213	10.8161	-1.40824	2.65414
H1	CDT1	29.4162	17.5035	11.9127	-0.311607	1.24109
J1	CDT1	29.7768	17.9669	11.8099	-0.414451	1.33279
K1	CDT1	30.9289	19.1007	11.8281	-0.396198	1.31603
L1	CT1	27.208	17.369	9.83906	-2.38528	5.22445
M1	CT1	26.7178	17.2015	9.51628	-2.70806	6.53441
P1	CT1	28.8114	19.9379	8.8735	-3.35084	10.2024
Q1	CT1	29.7624	17.7828	11.9796	-0.244769	1.1849
R1	CT1	30.3533	19.0786	11.2748	-0.949575	1.9313
S1	CT1	30.1227	19.8227	10.2999	-1.9244	3.79578
